# Supplementary material for: Salinity Stress Alters the Secondary Metabolic Profile of M. sativa, M. arborea and Their Hybrid (Alborea)
Source: MDPI journal article supplement (doi:10.3390/ijms22094882), 2021-05-05
Supplement: s1 [file s1]

### Supplementary Materials:

**Table S1.** VIP Compounds that differentiate the *M. arborea* from the Alborea & *M. sativa* species.

| RT<br>[min] | Molecular<br>Weight | Formula                                          | MS/MS                                                                                                          | Tentative Identification          | Category                        | Upregulated |
|-------------|---------------------|--------------------------------------------------|----------------------------------------------------------------------------------------------------------------|-----------------------------------|---------------------------------|-------------|
| 7.42        | 356.0749            | C <sub>15</sub> H <sub>16</sub> O <sub>10</sub>  | 147 (C <sub>9</sub> H <sub>7</sub> O <sub>2</sub> )                                                            | Caffeoyl glucuronide              | Hydroxycinnamic acid derivative | Arb         |
| 11.17       | 452.0787            | C <sub>16</sub> H <sub>20</sub> O <sub>15</sub>  | 269(C <sub>16</sub> H <sub>13</sub> O <sub>4</sub> )                                                           | Formononetin                      | Flavonoid                       | Arb         |
| 12.55       | 1042.4639           | C <sub>43</sub> H <sub>78</sub> O <sub>28</sub>  | 489(C <sub>30</sub> H <sub>49</sub> O <sub>3</sub> )                                                           | Caryophyllogenin type saponin     | Saponin                         | Arb         |
| 12.77       | 826.4370            | C <sub>42</sub> H <sub>66</sub> O <sub>16</sub>  | 489 (C <sub>30</sub> H <sub>49</sub> O <sub>3</sub> )                                                          | Caryophyllogenin type saponin     | Saponin                         | Arb         |
| 12.89       | 1220.5465           | C <sub>57</sub> H <sub>88</sub> O <sub>28</sub>  | 503 (C <sub>30</sub> H <sub>47</sub> O <sub>6</sub> )                                                          | Medicagenic acid saponin          | Saponin                         | Arb         |
| 13.03       | 1088.5048           | C <sub>52</sub> H <sub>80</sub> O <sub>24</sub>  | 503 (C <sub>30</sub> H <sub>47</sub> O <sub>6</sub> )                                                          | Medicagenic acid saponin          | Saponin                         | Arb         |
| 14.94       | 664.3828            | C <sub>36</sub> H <sub>56</sub> O <sub>11</sub>  | -                                                                                                              | Phytolaccasaponin                 | Saponin                         | Arb         |
| 8.52        | 486.0460            | C <sub>22</sub> H <sub>14</sub> O <sub>13</sub>  | 285 (C <sub>18</sub> H <sub>21</sub> O <sub>3</sub> )                                                          | -                                 | Diphenyl                        | alb,sat     |
| 10.88       | 588.2422            | C <sub>27</sub> H <sub>40</sub> O <sub>14</sub>  | 353 (C <sub>21</sub> H <sub>21</sub> O <sub>5</sub> )                                                          | Xanthohumol                       | flavonoid                       | alb,sat     |
| 11.29       | 828.3437            | C <sub>39</sub> H <sub>56</sub> O <sub>19</sub>  | 270 (C <sub>15</sub> H <sub>10</sub> O <sub>5</sub> )<br>194 (C <sub>10</sub> H <sub>10</sub> O <sub>4</sub> ) | Apigenin<br>Ferulic acid          | Flavonoid                       | alb,sat     |
| 11.11       | 1298.6179           | C <sub>60</sub> H <sub>98</sub> O <sub>30</sub>  | 518 (C <sub>30</sub> H <sub>46</sub> O <sub>7</sub> )                                                          | Cucurbitacin (zahnac acid)        | saponin                         | alb,sat     |
| 11.64       | 1090.5560           | C <sub>53</sub> H <sub>86</sub> O <sub>23</sub>  | -                                                                                                              | Medicago-saponin                  | saponin                         | alb,sat     |
| 11.93       | 1414.6250           | C <sub>64</sub> H <sub>102</sub> O <sub>34</sub> | 454 C <sub>29</sub> H <sub>42</sub> O <sub>4</sub>                                                             | Diosgenin derivative              | Flavonoid                       | alb,sat     |
| 13.06       | 1206.5650           | C <sub>57</sub> H <sub>90</sub> O <sub>27</sub>  | 456 (C <sub>29</sub> H <sub>44</sub> O <sub>4</sub> )<br>393 (C <sub>28</sub> H <sub>40</sub> O)               | O-Acetyldiosgenin+                | Flavonoid                       | Alb, sat    |
| 14.37       | 634.4086            | C <sub>36</sub> H <sub>58</sub> O <sub>9</sub>   | -                                                                                                              | Ecliptasaponin A                  | -                               | alb,sat     |
| 14.77       | 988.5258            | C <sub>49</sub> H <sub>80</sub> O <sub>20</sub>  | 471<br>(C <sub>30</sub> H <sub>47</sub> O <sub>4</sub> )                                                       | Hederagenin derivative<br>Saponin | Saponin                         | Alb Sat     |
| 14.79       | 780.4659            | C <sub>42</sub> H <sub>68</sub> O <sub>13</sub>  | -                                                                                                              | Salikosaponin                     | Saponin                         | alb,sat     |
| 15.58       | 704.3773            | C <sub>38</sub> H <sub>56</sub> O <sub>12</sub>  | 439<br>(C <sub>29</sub> H <sub>43</sub> O <sub>3</sub> )                                                       | Akebonoic acid type saponin       | Saponin                         | alb,sat     |
| 15.41       | 1028.519            | C <sub>51</sub> H <sub>80</sub> O <sub>21</sub>  | 270 (C <sub>15</sub> H <sub>10</sub> O <sub>5</sub> )                                                          | Apigenin derivative               | Flavonoid                       | alb,sat     |
| 15.7        | 706.3943            | C <sub>38</sub> H <sub>58</sub> O <sub>12</sub>  | 439<br>(C <sub>29</sub> H <sub>43</sub> O <sub>3</sub> )                                                       | Akebonoic acid type saponin       | Saponin                         | Alb Sat     |

**Table S2.** Differentiation of *M. sativa* and Alborea species concerning their secondary metabolites content.

| Shoots, Alborea vs <i>M. sativa</i> . |                     |                                                 |                                                          |                             |           |                 |
|---------------------------------------|---------------------|-------------------------------------------------|----------------------------------------------------------|-----------------------------|-----------|-----------------|
| RT<br>[min]                           | Molecular<br>Weight | Formula                                         | MS/MS                                                    | Tentative<br>Identification | Category  | Upregulate<br>d |
| 9.88                                  | 332.1597            | C <sub>19</sub> H <sub>24</sub> O <sub>5</sub>  | 244 (C <sub>18</sub> H <sub>12</sub> O)                  | -                           | Biphenyl  | alb             |
| 15.82                                 | 386.1727            | C <sub>22</sub> H <sub>26</sub> O <sub>6</sub>  | -                                                        | Eudesmin                    | Lignan    | alb             |
| 9.72                                  | 682.1382            | C <sub>29</sub> H <sub>30</sub> O <sub>19</sub> | -                                                        | Tenuifoliside B             | Phenol    | sat             |
| 10.69                                 | 858.1851            | C <sub>39</sub> H <sub>38</sub> O <sub>22</sub> | 285 (C <sub>15</sub> H <sub>9</sub> O <sub>6</sub> )     | Aureusidin                  | Flavonoid | sat             |
| 10.81                                 | 506.1064            | C <sub>23</sub> H <sub>22</sub> O <sub>13</sub> | 286<br>(C <sub>15</sub> H <sub>10</sub> O <sub>6</sub> ) | Luteolin                    | Flavonoid | sat             |
| 13.38                                 | 622.1321            | C <sub>31</sub> H <sub>26</sub> O <sub>14</sub> | 270<br>(C <sub>15</sub> H <sub>10</sub> O <sub>5</sub> ) | Apigenin                    | Flavonoid | sat             |
| 13.26                                 | 1042.4620           | C <sub>50</sub> H <sub>74</sub> O <sub>23</sub> | 485<br>(C <sub>30</sub> H <sub>45</sub> O <sub>5</sub> ) | Quinovic acid               | Saponin   | sat             |

|       |           |                                                     |                                                          |           |              |     |
|-------|-----------|-----------------------------------------------------|----------------------------------------------------------|-----------|--------------|-----|
| 11.20 | 1106.5510 | C <sub>53</sub> H <sub>86</sub> O <sub>2</sub><br>4 | 436<br>(C <sub>30</sub> H <sub>44</sub> O <sub>2</sub> ) | Ganoderal | Triterpenoid | sat |
| 13.26 | 1174.5040 | C <sub>55</sub> H <sub>82</sub> O <sub>2</sub><br>7 | 436<br>(C <sub>30</sub> H <sub>44</sub> O <sub>2</sub> ) | Ganoderal | Triterpenoid | sat |

| Roots, Alborea vs <i>M. sativa</i> |                  |                                                     |                                                          |                                   |                 |             |
|------------------------------------|------------------|-----------------------------------------------------|----------------------------------------------------------|-----------------------------------|-----------------|-------------|
| RT [min]                           | Molecular Weight | Formula                                             | MS/MS                                                    | Tentative Identification          | Category        | Upregulated |
| 11.58                              | 254.0579         | C <sub>15</sub> H <sub>10</sub> O <sub>4</sub>      | -                                                        | Daidzein                          | Isoflavones     | alb         |
| 15.82                              | 386.1727         | C <sub>22</sub> H <sub>26</sub> O <sub>6</sub>      | -                                                        | Eudesmin                          | Lignan          | alb         |
| 12.20                              | 1090.5200        | C <sub>52</sub> H <sub>82</sub> O <sub>2</sub><br>4 | 446<br>(C <sub>28</sub> H <sub>46</sub> O <sub>4</sub> ) | Methylspirostane type saponin     | Saponin         | sat         |
| 12.21                              | 1222.5630        | C <sub>57</sub> H <sub>90</sub> O <sub>2</sub><br>8 | 446<br>(C <sub>28</sub> H <sub>46</sub> O <sub>4</sub> ) | Methylspirostane type saponin     | Saponin         | sat         |
| 12.21                              | 518.3247         | C <sub>30</sub> H <sub>46</sub> O <sub>7</sub>      | -                                                        | Zanhic acid                       | Saponin aglycon | sat         |
| 15.27                              | 486.3349         | C <sub>30</sub> H <sub>46</sub> O <sub>5</sub>      | -                                                        | Quillaic Acid                     | Saponin aglycon | sat         |
| 15.02                              | 810.4406         | C <sub>42</sub> H <sub>66</sub> O <sub>1</sub><br>5 | -                                                        | Esculentoside or Azukisaponin III | Saponin         | sat         |
| 15.01                              | 824.4197         | C <sub>42</sub> H <sub>64</sub> O <sub>1</sub><br>6 | -                                                        | Uralsaponin                       | Saponin         | sat         |

**Table S3.** Relative fold changes of differential secondary metabolites for Roots of *M. sativa*, *M. arborea* and Alborea under salt-stress and salt-sock treatments.

| Roots      |                                                 | Log fold change                                 |                                           |                                                 |                                           |                                                 |                                           |
|------------|-------------------------------------------------|-------------------------------------------------|-------------------------------------------|-------------------------------------------------|-------------------------------------------|-------------------------------------------------|-------------------------------------------|
|            |                                                 | <i>M. arborea</i>                               |                                           | <i>M. sativa</i>                                |                                           | Alborea                                         |                                           |
|            | Molecular Formula                               | Log <sub>2</sub> <sup>(50-75-100/control)</sup> | Log <sub>2</sub> <sup>(100/control)</sup> | Log <sub>2</sub> <sup>(50-75-100/control)</sup> | Log <sub>2</sub> <sup>(100/control)</sup> | Log <sub>2</sub> <sup>(50-75-100/control)</sup> | Log <sub>2</sub> <sup>(100/control)</sup> |
| Saponins   | C <sub>60</sub> H <sub>92</sub> O <sub>28</sub> | -3.14                                           | ns                                        | ns                                              | ns                                        | ns                                              | ns                                        |
|            | C <sub>48</sub> H <sub>72</sub> O <sub>19</sub> | -3.64                                           | ns                                        | ns                                              | ns                                        | ns                                              | ns                                        |
|            | C <sub>52</sub> H <sub>82</sub> O <sub>24</sub> | -3.42                                           | ns                                        | ns                                              | ns                                        | ns                                              | ns                                        |
|            | C <sub>50</sub> H <sub>94</sub> O <sub>33</sub> | -3.22                                           | ns                                        | ns                                              | ns                                        | ns                                              | ns                                        |
|            | C <sub>52</sub> H <sub>82</sub> O <sub>24</sub> | -5.61                                           | ns                                        | ns                                              | ns                                        | ns                                              | ns                                        |
|            | C <sub>42</sub> H <sub>68</sub> O <sub>15</sub> | ns                                              | -3.32                                     | ns                                              | ns                                        | ns                                              | ns                                        |
|            | C <sub>42</sub> H <sub>66</sub> O <sub>15</sub> | ns                                              | -4.18                                     | ns                                              | ns                                        | ns                                              | ns                                        |
|            | C <sub>39</sub> H <sub>60</sub> O <sub>13</sub> | ns                                              | -4.05                                     | ns                                              | ns                                        | ns                                              | ns                                        |
|            | C <sub>36</sub> H <sub>54</sub> O <sub>12</sub> | ns                                              | ns                                        | ns                                              | ns                                        | ns                                              | -4,57                                     |
|            | C <sub>36</sub> H <sub>56</sub> O <sub>11</sub> | ns                                              | ns                                        | ns                                              | ns                                        | ns                                              | -6,25                                     |
|            | C <sub>39</sub> H <sub>58</sub> O <sub>14</sub> | ns                                              | ns                                        | ns                                              | ns                                        | ns                                              | -4.93                                     |
| Flavonoids | C <sub>46</sub> H <sub>74</sub> O <sub>17</sub> | ns                                              | ns                                        | ns                                              | ns                                        | ns                                              | -7,01                                     |
|            | C <sub>59</sub> H <sub>80</sub> O <sub>17</sub> | ns                                              | ns                                        | ns                                              | ns                                        | ns                                              | -5,6                                      |
|            | C <sub>26</sub> H <sub>30</sub> O <sub>12</sub> | -4.3                                            | ns                                        | ns                                              | ns                                        | ns                                              | ns                                        |
|            | C <sub>25</sub> H <sub>24</sub> O <sub>13</sub> | ns                                              | ns                                        | -3,36                                           | ns                                        | ns                                              | ns                                        |
|            | C <sub>25</sub> H <sub>24</sub> O <sub>12</sub> | ns                                              | ns                                        | -3,12                                           | ns                                        | ns                                              | ns                                        |
|            |                                                 |                                                 |                                           |                                                 |                                           |                                                 |                                           |
|            |                                                 |                                                 |                                           |                                                 |                                           |                                                 |                                           |

|                        |                                                 |      |       |       |    |      |       |
|------------------------|-------------------------------------------------|------|-------|-------|----|------|-------|
| Triterpenic acids      | C <sub>26</sub> H <sub>26</sub> O <sub>13</sub> | ns   | ns    | ns    | ns | 3.41 |       |
|                        |                                                 | ns   | -4.08 |       | ns | ns   | ns    |
|                        | C <sub>30</sub> H <sub>46</sub> O <sub>4</sub>  |      |       |       |    |      |       |
|                        | C <sub>30</sub> H <sub>48</sub> O <sub>5</sub>  | ns   | -3.39 |       | ns | ns   | ns    |
|                        | C <sub>30</sub> H <sub>46</sub> O <sub>6</sub>  | ns   | ns    | ns    | ns | ns   | -5.33 |
|                        | C <sub>30</sub> H <sub>46</sub> O <sub>6</sub>  | ns   | ns    | ns    | ns | ns   | -5.86 |
| Lignans                | C <sub>30</sub> H <sub>44</sub> O <sub>5</sub>  | ns   | ns    | ns    | ns | ns   | -5.34 |
|                        | C <sub>30</sub> H <sub>46</sub> O <sub>6</sub>  | ns   | ns    | ns    | ns | ns   | -3.84 |
|                        | C <sub>22</sub> H <sub>26</sub> O <sub>6</sub>  | 9.56 | ns    | 6,32  | ns | ns   | 9.4   |
|                        | C <sub>22</sub> H <sub>26</sub> O <sub>6</sub>  | 7.32 | ns    | 9,64  | ns | ns   | ns    |
| Benzyl Tetrahydrofuran | C <sub>22</sub> H <sub>26</sub> O <sub>6</sub>  | ns   | ns    | 7.28  | ns | ns   | ns    |
|                        |                                                 | 7.50 | ns    |       | ns | ns   | 8.26  |
| Phenols                | C <sub>14</sub> H <sub>18</sub> O <sub>5</sub>  |      |       | 4,81  |    |      |       |
|                        | C <sub>14</sub> H <sub>18</sub> O <sub>5</sub>  | 7.22 | ns    | 7,29  | ns | ns   | ns    |
|                        | C <sub>14</sub> H <sub>18</sub> O <sub>5</sub>  |      |       | 7,34  | ns | ns   | ns    |
|                        | C <sub>14</sub> H <sub>18</sub> O <sub>5</sub>  |      |       | 7.39  | ns | ns   | ns    |
|                        | C <sub>13</sub> H <sub>18</sub> O <sub>5</sub>  | 7.36 | ns    | 7.43  | ns | ns   | ns    |
|                        | C <sub>33</sub> H <sub>38</sub> O <sub>6</sub>  | ns   | ns    | -3.71 | ns | ns   | ns    |
|                        | C <sub>20</sub> H <sub>22</sub> O <sub>3</sub>  | ns   | ns    | 6.56  | ns | ns   | ns    |

**Table S4.** Relative fold changes of differential secondary metabolites for Shoots of *M. sativa*, *M. arborea* and Alborea under salt-stress and salt-sock treatments.

| Shoots                  |                                                 | Log fold change                      |                                |                                      |                                |                                      |                                |
|-------------------------|-------------------------------------------------|--------------------------------------|--------------------------------|--------------------------------------|--------------------------------|--------------------------------------|--------------------------------|
|                         |                                                 | <i>M. arborea</i>                    |                                | <i>M. sativa</i>                     |                                | Alborea                              |                                |
|                         |                                                 | Log <sub>2</sub> (50-75-100/control) | Log <sub>2</sub> (100/control) | Log <sub>2</sub> (50-75-100/control) | Log <sub>2</sub> (100/control) | Log <sub>2</sub> (50-75-100/control) | Log <sub>2</sub> (100/control) |
| Flavonoid glycosides    | C <sub>27</sub> H <sub>26</sub> O <sub>17</sub> | ns                                   | ns                             | -4.23                                | ns                             | ns                                   | ns                             |
|                         | C <sub>43</sub> H <sub>42</sub> O <sub>26</sub> | ns                                   | ns                             | -4.43                                | ns                             | ns                                   | ns                             |
|                         | C <sub>43</sub> H <sub>42</sub> O <sub>26</sub> | ns                                   | ns                             | -3.8                                 | ns                             | ns                                   | ns                             |
|                         | C <sub>42</sub> H <sub>40</sub> O <sub>25</sub> | ns                                   | ns                             | -4.46                                | ns                             | ns                                   | ns                             |
|                         | C <sub>28</sub> H <sub>28</sub> O <sub>18</sub> | ns                                   | ns                             | -3.78                                | ns                             | ns                                   | ns                             |
|                         | C <sub>34</sub> H <sub>62</sub> O <sub>22</sub> | ns                                   | ns                             | -7.31                                | ns                             | ns                                   | ns                             |
| Flavonoids              | C <sub>21</sub> H <sub>18</sub> O <sub>11</sub> | ns                                   | ns                             |                                      | ns                             | ns                                   | 3.23                           |
| Triterpenic acids       | C <sub>30</sub> H <sub>46</sub> O <sub>6</sub>  | ns                                   | ns                             |                                      | ns                             | ns                                   | 3.78                           |
| Lignans                 | C <sub>22</sub> H <sub>26</sub> O <sub>6</sub>  | ns                                   | ns                             | 7.65                                 | ns                             | ns                                   | 10.08                          |
|                         | C <sub>22</sub> H <sub>26</sub> O <sub>6</sub>  | ns                                   | ns                             | 10.45                                | ns                             | ns                                   | 7.12                           |
|                         | C <sub>20</sub> H <sub>22</sub> O <sub>3</sub>  | ns                                   | ns                             | 7.49                                 | ns                             | ns                                   | ns                             |
|                         | C <sub>22</sub> H <sub>26</sub> O <sub>6</sub>  | ns                                   | ns                             | 8.59                                 | ns                             | ns                                   | ns                             |
| Benzyl tetrahydrofurans | C <sub>14</sub> H <sub>18</sub> O <sub>5</sub>  | ns                                   | ns                             |                                      | ns                             | ns                                   | 7.47                           |
|                         | C <sub>14</sub> H <sub>18</sub> O <sub>5</sub>  | ns                                   | ns                             |                                      | ns                             | ns                                   | 7.5                            |
|                         | C <sub>14</sub> H <sub>18</sub> O <sub>5</sub>  | ns                                   | ns                             |                                      | ns                             | ns                                   | 7.57                           |
|                         | C <sub>14</sub> H <sub>18</sub> O <sub>5</sub>  | ns                                   | ns                             | 7.87                                 | ns                             | ns                                   | ns                             |
|                         | C <sub>14</sub> H <sub>18</sub> O <sub>5</sub>  | ns                                   | ns                             | 8.22                                 | ns                             | 8.16                                 | ns                             |
|                         | C <sub>14</sub> H <sub>18</sub> O <sub>5</sub>  | ns                                   | ns                             | 8.31                                 | ns                             | ns                                   | ns                             |
|                         | C <sub>14</sub> H <sub>18</sub> O <sub>5</sub>  | ns                                   | ns                             | 7.86                                 | ns                             | ns                                   | ns                             |
| Phenols                 |                                                 |                                      |                                |                                      |                                |                                      |                                |
|                         | C <sub>13</sub> H <sub>18</sub> O <sub>5</sub>  | ns                                   | ns                             | 8.15                                 | ns                             | ns                                   | ns                             |
|                         | C <sub>24</sub> H <sub>30</sub> O <sub>6</sub>  | ns                                   | ns                             |                                      | ns                             | ns                                   | -4.49                          |

|           |                                                |    |    |       |    |    |    |
|-----------|------------------------------------------------|----|----|-------|----|----|----|
| Biphenyls | C <sub>24</sub> H <sub>30</sub> O <sub>6</sub> | ns | ns | -3.24 | ns | ns | ns |
|-----------|------------------------------------------------|----|----|-------|----|----|----|

**Table S5.** Main secondary metabolites over-expressed in *M. arborea* (green) vs *M. sativa* and Alborea (blue) under the two salinity treatments in roots and shoots

|                                    | Roots                                                                                 | Shoots                                                                                                             |
|------------------------------------|---------------------------------------------------------------------------------------|--------------------------------------------------------------------------------------------------------------------|
| Acute stress (100 mM NaCl)         | <p>Saponins (mainly zahnic and medicagenic acid)</p> <p>Lignan (only for Alborea)</p> | <p>Phenolic compounds (Hydroxycinnamic acids)</p> <p>Triterpenic saponins flavonoid, lignan (only for Alborea)</p> |
| Gradual stress (50-75-100 mM NaCl) | <p>Saponins</p> <p>Flavonoids, phenols, lignan (only for Alborea)</p>                 | <p>Phenolic compounds (Hydroxycinnamic acids)</p> <p>Triterpenic saponins, flavonoid</p>                           |

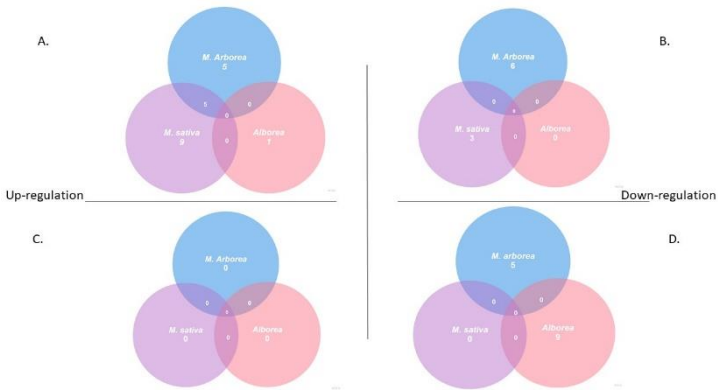

**Figure S1.** Venn diagrams depicting the total number of metabolites significantly altered (below the entry’s name) as well as the overlapping metabolites between the three entries in the roots under the two different salt treatments. A. Up-regulation 50-75-100 mM NaCl, B. down-regulation 50-75-100 mM NaCl, C. Up-regulation 100 mM NaCl, D. Down-regulation 100 mM NaCl

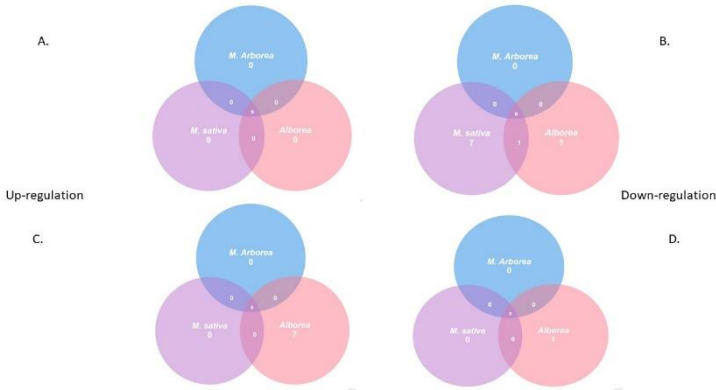

**Figure S2.** Venn diagrams depicting the total number of metabolites significantly altered (below the entry's name) as well as the overlapping metabolites between the three entries in the shoots under the two different salt treatments. A. Up-regulation 50-75-100 mM NaCl, B. down-regulation 50-75-100 mM NaCl, C. Up-regulation 100 mM NaCl, D. Down-regulation 100 mM NaCl
